# Supplementary material for: The role of ATP-binding Cassette subfamily B member 6 in the inner ear
Source: PubMed Central journal article supplement (PMC11574312; doi:10.1038/s41467-024-53663-x), 2024-11-18
Supplement: 41467_2024_53663_MOESM3_ESM.pdf [file 41467_2024_53663_MOESM3_ESM.pdf]

## **Descripton of Additional Supplementary Files**

**Supplementary Movie 1:** Swimming patterns of uninjected zebrafish

**Supplementary Movie 2:** Swimming patterns of Abcb6 MO15 zebrafish
